# Supplementary material for: Forced Hepatic Expression of NRF2 or NQO1 Impedes Hepatocyte Lipid Accumulation in a Lipodystrophy Mouse Model
Source: MDPI journal article supplement (doi:10.3390/ijms241713345), 2023-08-28

**Table S1.** Primers for mouse genotyping

| <i>Genotyping for Keap1<sup>A/A</sup> background mouse</i>    |                                |
|---------------------------------------------------------------|--------------------------------|
| Primers                                                       | Sequence (5' - 3')             |
| 5-cko 4int1                                                   | GCACATCCTTCATCTCTCCGCACTGGGGAG |
| 3-Kp1-4Ex                                                     | CCTCCGTGTCAACATTGGCGCGACTAG    |
| R260-EGFP                                                     | GACTTGAAGAAGTCGTGCTGCTTCATGTG  |
| <i>Genotyping for Keap1<sup>B/B</sup> background mouse</i>    |                                |
| Keap1-BF-F                                                    | CGAGGAAGCGTTTGCTTTAC           |
| BF-R1                                                         | AGCCCCCTGCTGCATAGATAC          |
| NeoI-3R                                                       | GAGTCACCGTAAGCCTGGTC           |
| Keap1-4F                                                      | GAGTCCACAGTGTGTGGCC            |
| <i>Genotyping for Rosa<sup>NIC/NIC</sup> background mouse</i> |                                |
| IMR0883                                                       | AAAGTCGCTCTGAGTTGTTAT          |
| IMR8038                                                       | TAAGCCTGCCCAGAAGACTC           |
| IMR8039                                                       | GAAAGACCGCGAAGAGTTTG           |
| PGK-3740                                                      | GATGTGGAATGTGTGCGAGGCCAGAGGC   |
| NICD-5477                                                     | GATTGTCGTCCATCAGAGCACCATCTGAGG |
| <i>Genotyping for Cre background mouse</i>                    |                                |
| Cre1                                                          | ACGTTCAACGGCATCAACGT           |
| Cre2                                                          | CTGCATTACCGGTCGATGCA           |

**Table S2.** PCR programs for mouse genotyping

| <i>Keap1<sup>A/A</sup> background mouse</i>                  |         |        |                                |
|--------------------------------------------------------------|---------|--------|--------------------------------|
| Step #                                                       | Temp °C | Time   | Note                           |
| 1                                                            | 95      | 1 min  | -                              |
| 2                                                            | 95      | 30 sec | -                              |
| 3                                                            | 68.5    | 30 sec | -                              |
| 4                                                            | 72      | 30 sec | repeat steps 2-4 for 35 cycles |
| 5                                                            | 72      | 1 min  | -                              |
| 6                                                            | 4       | -      | hold                           |
| Product; Flox A : ~350 bp, Disrupted : ~550 bp, Wt : ~250 bp |         |        |                                |
| <i>Keap1<sup>B/B</sup> background mouse</i>                  |         |        |                                |
| Regular genotyping      Primer: Keap1 BF-F and BF-R1         |         |        |                                |
| Step #                                                       | Temp °C | Time   | Note                           |
| 1                                                            | 98      | 3 min  | -                              |

|                                                                                                                                              |                |             |                                |
|----------------------------------------------------------------------------------------------------------------------------------------------|----------------|-------------|--------------------------------|
| 2                                                                                                                                            | 95             | 30 sec      | -                              |
| 3                                                                                                                                            | 68             | 30 sec      | -                              |
| 4                                                                                                                                            | 72             | 30 sec      | repeat steps 2-4 for 35 cycles |
| 5                                                                                                                                            | 4              | -           | hold                           |
| Product; Flox B : 445 bp, Wt : 267 bp                                                                                                        |                |             |                                |
| <b>Excision confirmation Primer: Keap1-4F, BF-F and NeoI-3R</b>                                                                              |                |             |                                |
| <b>Step #</b>                                                                                                                                | <b>Temp °C</b> | <b>Time</b> | <b>Note</b>                    |
| 1                                                                                                                                            | 95             | 1 min       | -                              |
| 2                                                                                                                                            | 95             | 30 sec      | -                              |
| 3                                                                                                                                            | 68.5           | 30 sec      | -                              |
| 4                                                                                                                                            | 72             | 30 sec      | repeat steps 2-4 for 35 cycles |
| 5                                                                                                                                            | 72             | 1 min       | -                              |
| 6                                                                                                                                            | 4              | -           | hold                           |
| Product; Undisrupted : 383 bp, Disrupted : 288 bp, Wt : ~205 bp                                                                              |                |             |                                |
| <i>Rosa<sup>NIC/NIC</sup></i> mouse ( <a href="https://www.jax.org/strain/008159">https://www.jax.org/strain/008159</a> ) accessed 8/21/2023 |                |             |                                |
| <b>Regular genotyping Primers: IMR0883, IMR8038 and IMR8039</b>                                                                              |                |             |                                |
| <b>Step #</b>                                                                                                                                | <b>Temp °C</b> | <b>Time</b> | <b>Note</b>                    |
| 1                                                                                                                                            | 94             | 3 min       | -                              |
| 2                                                                                                                                            | 94             | 30 sec      | -                              |
| 3                                                                                                                                            | 54             | 1 min       | -                              |
| 4                                                                                                                                            | 72             | 1 min       | repeat steps 2-4 for 35 cycles |
| 5                                                                                                                                            | 72             | 2 min       | -                              |
| 6                                                                                                                                            | 10             | -           | hold                           |
| Product; Tg : 320 bp, Wt : 235 bp                                                                                                            |                |             |                                |
| <b><i>Rosa<sup>NIC</sup></i> active allele by Cre Primers; IMR0883, NICD-5477 and PGK-3740</b>                                               |                |             |                                |
| <b>Step #</b>                                                                                                                                | <b>Temp °C</b> | <b>Time</b> | <b>Note</b>                    |
| 1                                                                                                                                            | 95             | 1 min       | -                              |
| 2                                                                                                                                            | 95             | 30 sec      | -                              |
| 3                                                                                                                                            | 65.4           | 30 sec      | -                              |
| 4                                                                                                                                            | 72             | 45 sec      | repeat steps 2-4 for 35 cycles |
| 5                                                                                                                                            | 72             | 2 min       | -                              |
| 6                                                                                                                                            | 4              | -           | hold                           |
| Product; Cre-Active : 650 bp, Cre-Inactive : 550 bp                                                                                          |                |             |                                |
| <b><i>Cre transgenic allele</i></b>                                                                                                          |                |             |                                |
| <b>Step #</b>                                                                                                                                | <b>Temp °C</b> | <b>Time</b> | <b>Note</b>                    |
| 1                                                                                                                                            | 94             | 1 min       | -                              |
| 2                                                                                                                                            | 94             | 30 sec      | -                              |

|                                 |    |        |                                |
|---------------------------------|----|--------|--------------------------------|
| 3                               | 60 | 30 sec | -                              |
| 4                               | 72 | 30 sec | repeat steps 2-4 for 35 cycles |
| 5                               | 4  | -      | hold                           |
| Product; <i>Cre-Tg</i> : 355 bp |    |        |                                |

**Table S3.** Primers for transgene confirmation

| Primers        | Sequence (5' - 3')     |
|----------------|------------------------|
| CAGGs          | CTCTAGAGCCTCTGCTAACC   |
| PB-6679080a1-R | AGGCGTCCTTCCTTATATGCTA |
| pCAG-F         | GCAACGTGCTGGTTATTGTG   |
| PB-6754832a1-R | GTTGAAACTGAGCGAAAAAGGC |

**Table S4.** PCR program for HTI-transgene confirmation

Primer for DA-*Nrf2*: pCAG-F and PB-6754832a1-R

Primer for *Nqo1*: CAGGs and PB-6679080a1-R

| Step # | Temp °C | Time   | Note                           |
|--------|---------|--------|--------------------------------|
| 1      | 94      | 1 min  | -                              |
| 2      | 95      | 30 sec | -                              |
| 3      | 65.7    | 30 sec | -                              |
| 4      | 72      | 20 sec | repeat steps 2-4 for 35 cycles |
| 5      | 4       | -      | hold                           |

Product; DA-*Nrf2* : 294 bp, *Nqo1*: 401bp

**Table S5.** Primers used in mutagenesis

| Primer            | Sequence (5' - 3')                                                                                       |
|-------------------|----------------------------------------------------------------------------------------------------------|
| 5-Nrf2-XN-ATG     | CTAGTCTAGACATATGATGGACTTGGAGTTGCCACCGCC                                                                  |
| 5-Nrf2 DLG-A SfcI | AGGACTACAGTCCCAGCAGGACATGGATTTGATTGACATCGCATGGAGGGCAGCAAT<br>AGCAGCTGCAGTAAGTCGAGAAGTGTTTGACTTTAGTCAG    |
| 5-KA-Nrf2 BglII   | ATAGATCTTGGAGTAAGTCGAGAAGTGTTTGACTTTAGTCAGCGACAGGCAGACTATG<br>AGCTGGAAGCACAGGCAGCACTCGAAGCGGAAAGACAAGAGC |
| 5'-PstI-KA-Nhe2   | GAGCAACTGCAGGCGGAACAGGAGGCGG                                                                             |
| 3'-PstI-KA-Nhe2   | TTCCGCCTGCAGTTGCTCTTGTCTTTCC                                                                             |
| 3-BamHI           | CCTGGGAGTAGCTGGCGGATCCACTG                                                                               |
| 3-KA Nrf2 EcoRI   | AGGAATTCTCCTGTTTCTTCATCCAGTTGAAACTGAGCGAAAAAGGCCGCCTCCTGTTC<br>CGCCTGGAGTTGCTCTTGTCTTTCCGCTTCGAGTGCTGCCT |

**Table S6.** Antibodies used in experiments

| <b>Target Protein</b>                      | <b>Provider</b>             | <b>Dilution</b> |
|--------------------------------------------|-----------------------------|-----------------|
| Nrf2                                       | Invitrogen PA5-27882        | 2,000           |
| LaminB1                                    | Proteintech 12987-1-AP      | 5,000           |
| Nqo1                                       | Abcam ab2346                | IB, IHC: x 500  |
| Gclc                                       | Proteintech 12601-1-AP      | 2,000           |
| GstA1-5                                    | Invitrogen PA5-79335        | 2,000           |
| Acc1                                       | Proteintech 21923-1-AP      | 1,000           |
| Fasn                                       | Proteintech 10624-2-AP      | 1,000           |
| Keap1                                      | Original                    | 3,000           |
| Luciferase                                 | Novus Biological NB100-1677 | 1,000           |
| Rabbit anti-Goat IgG<br>(H+L)-HRP          | Invitrogen 31402            | 10,000          |
| Goat Anti-Rabbit IgG<br>(H + L)-HRP        | BIO RAD 1706515             | 3,000           |
| Horse anti-Goat IgG<br>(H+L), Biotinylated | Vector Laboratories BA-9500 | x 200           |

**Supplemental Figure S1. *Keap1* and flox mutant gene structure and primer positions for genotyping.** (A) *Kp1<sup>A/A</sup>* flox allele. (B) *Kp1<sup>B/B</sup>* flox allele. Grey and blue boxes indicate non-coding and coding region of each exon of *Keap1* gene. The triangles show position of flanking lox sequences in mutant mice.

**Supplemental Figure S2. Representative results of confirmative genotyping.** The positive controls were from tail DNA isolated from each heterozygote of *Kp1<sup>A/+</sup>*, *Kp1<sup>B/+</sup>*, *Rosa<sup>NIC/+</sup>* and *Rosa<sup>NIC/+</sup>::AdiCre* mice for *Keap1 A flox* (top), *Keap1 B flox* (second), *Rosa* (third), and *Adipoq Cre* (bottom) genotyping, respectively.

**Supplemental Figure S3. Confirmation of transgene by HTI.** The primer set positions for *Nqo1* (CAGGs, PB-6679080a-1-R) and *DA-NRF2* expression vectors (pCAG-F, PB-6754832a1-R) are depicted in (A). The representative PCR results are shown in (B). White, steel grey and mercury boxes show the representative result of transgene detection from *pCAG Mock*, *pCAG Nqo1* and *pCAG DA-Nrf2* HTI mice (N=4), respectively. 1μL of template DNA was utilized as control which includes 10ng of each plasmid DNA mixed with wild-type tail genomic DNA treated as per usual genotyping.

**Supplemental Figure S4. Immunohistochemical analysis of NQO1 expression in the HTI-liver of *Rosa<sup>NIC/NIC</sup>::AdiCre* mice.** 5-week old male *Rosa<sup>NIC/NIC</sup>::AdiCre* mice were hydrodynamically injected with *pCAG Mock* (A) or *pCAG Nqo1* (B) through the tail vein. Five weeks following HTI and feeding with HFD, livers were isolated from the mice and its sections were prepared and analyzed with anti-NQO1 antibody immunohistochemically. NQO1 derived from *pCAG Nqo1* HTI liver was stained strongly by the precipitated DAB reaction product. Scale bar: 100 μm.

**(A) *Keap1* Wild type allele**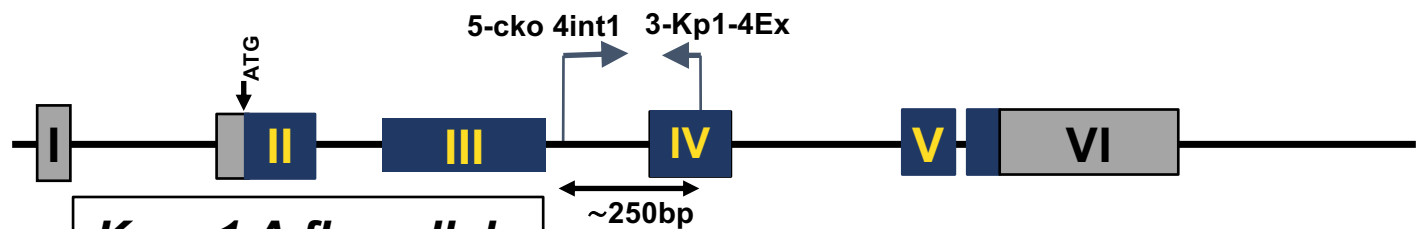***Keap1 A* excision allele by Cre Expression**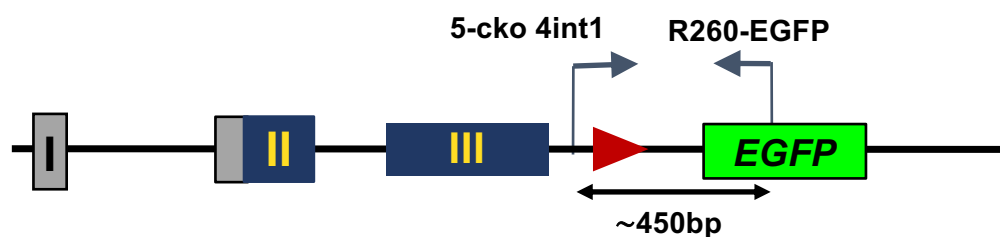**(B) *Keap1* Wild type allele**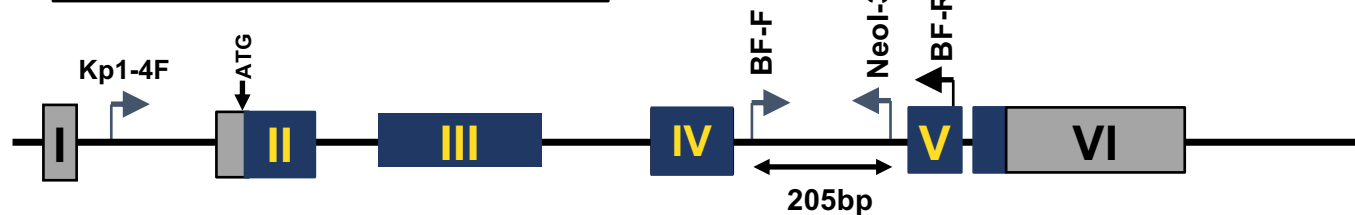***Keap1 B* excision allele by Cre Expression**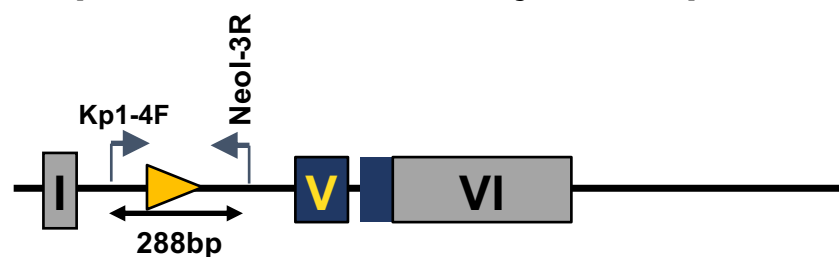

**Figure S2**

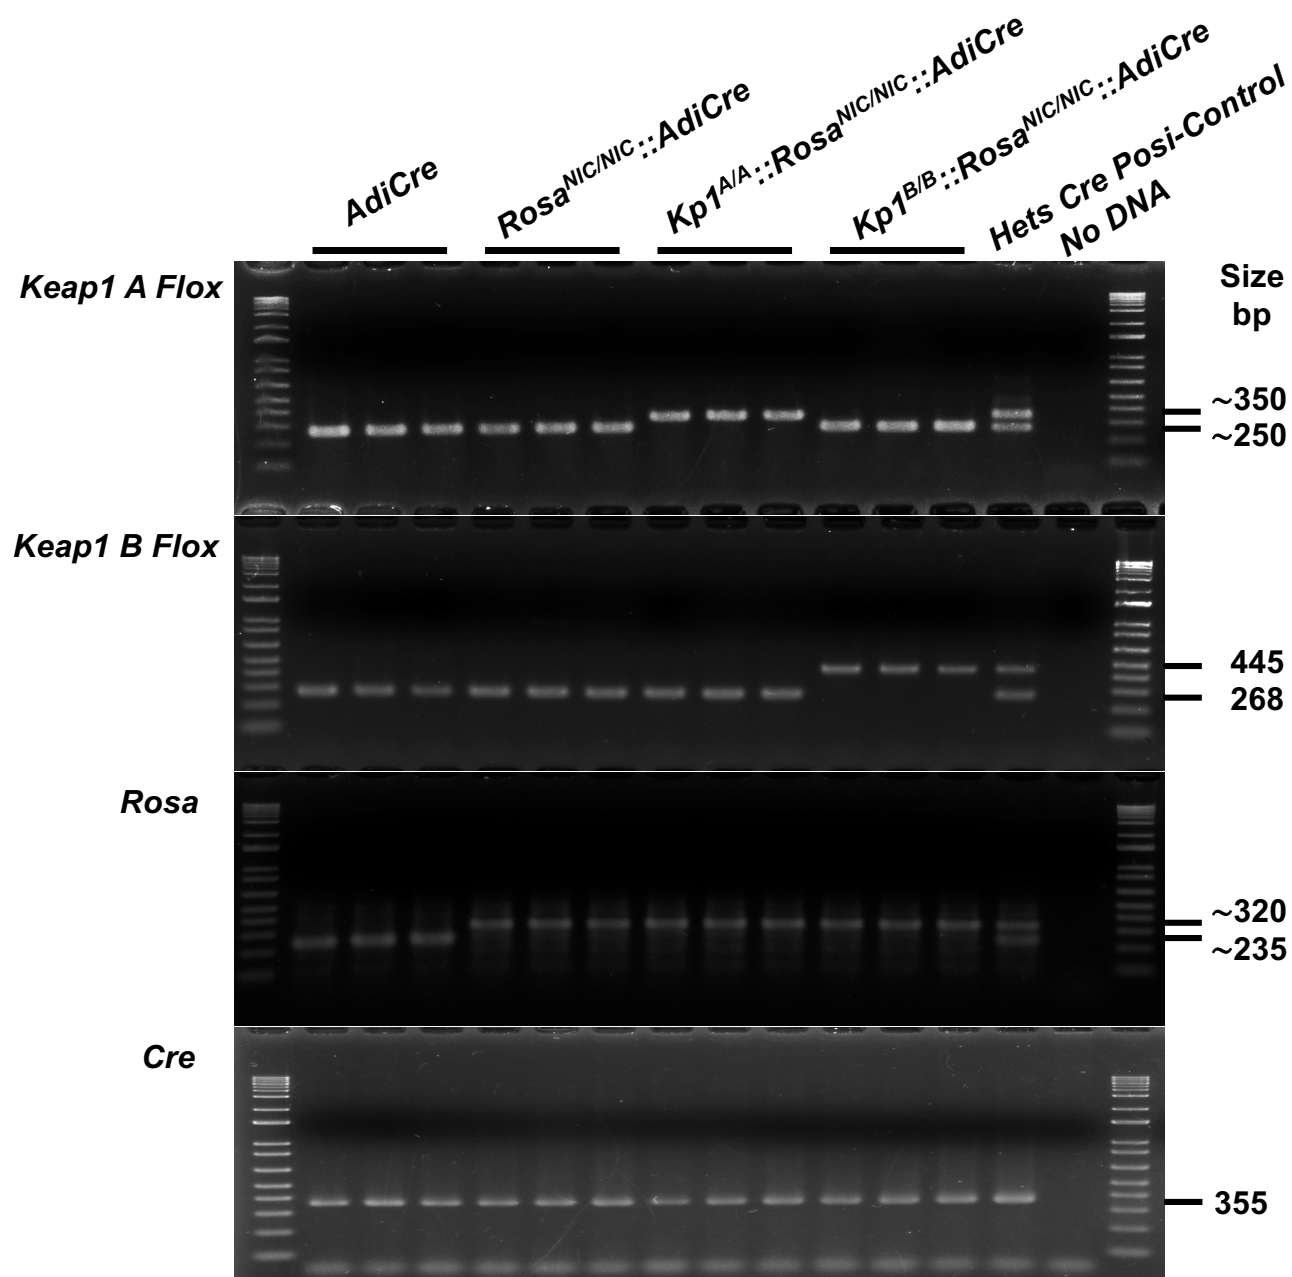

**Liver Genomic DNA  
of each mouse (n=3/ group)**

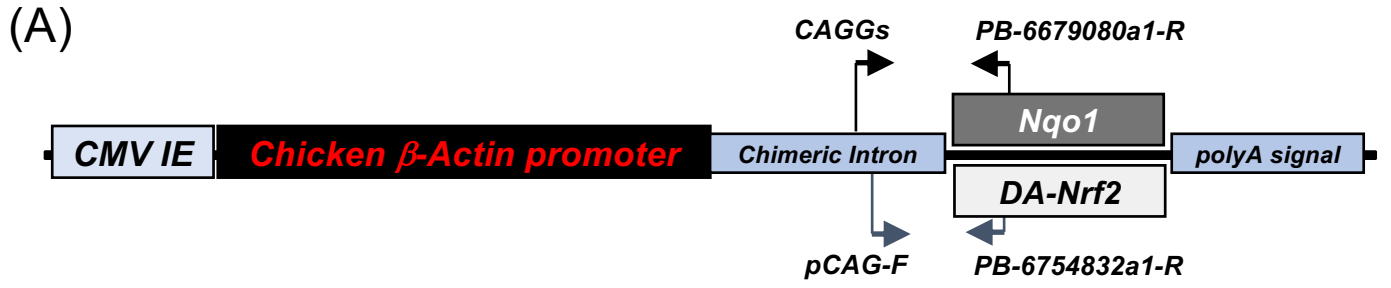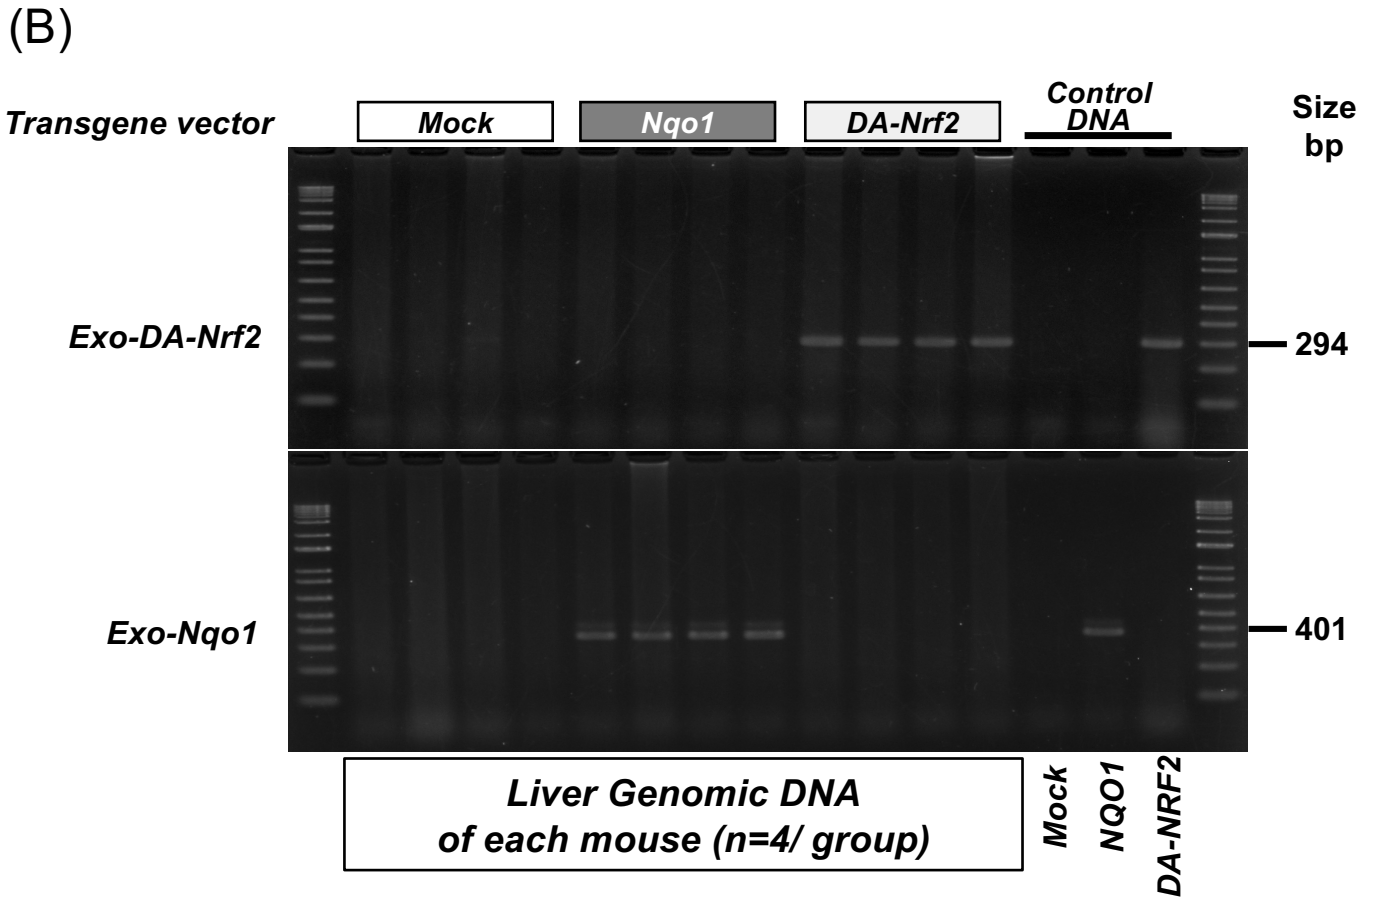



(A)

***pCAG Mock***

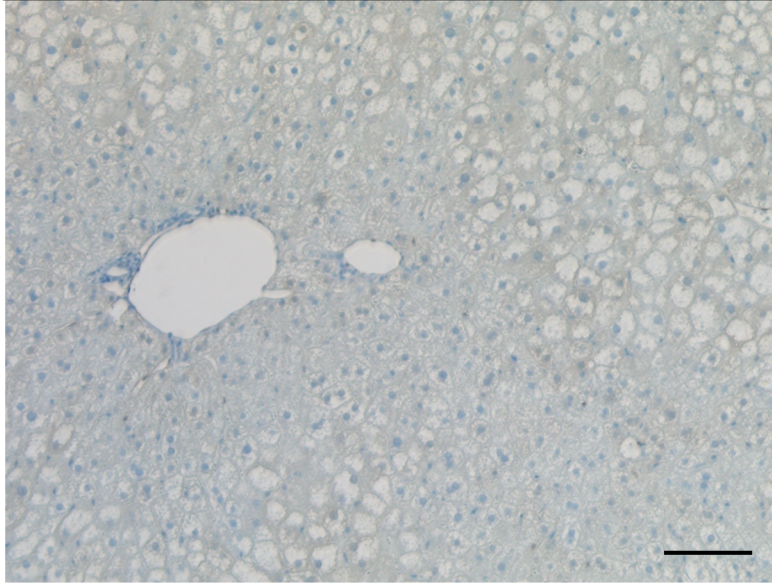

(B)

***pCAG Nqo1***

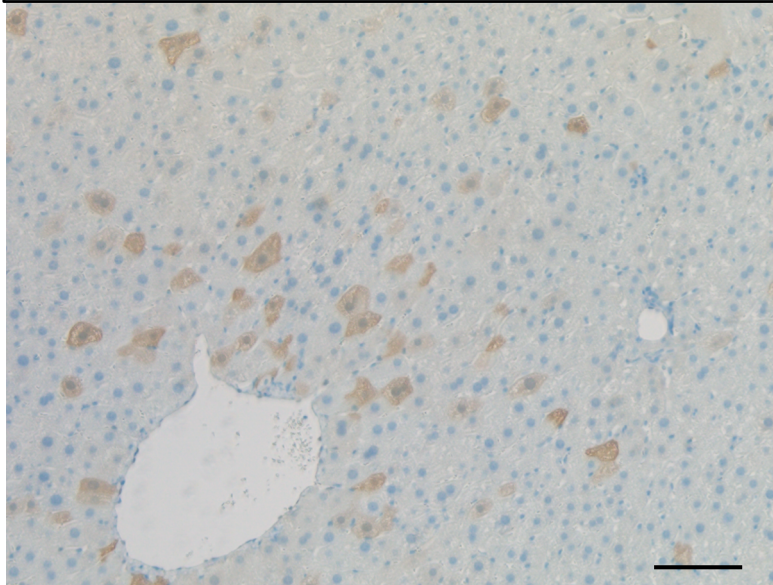

Supplement: s1 [file s1]
